# Supplementary material for: Improved Training and Semen Collection Outcomes Using the Closed Box Chair for Macaques
Source: MDPI journal article supplement (doi:10.3390/ani11082384), 2021-08-12
Supplement: s1 [file s1]

*Supplementary Materials*

# Improved Training and Semen Collection Outcomes Using the Closed Box Chair for Macaques

Lisa A. Houser <sup>1</sup>, Cathy Ramsey <sup>2</sup>, Fernanda M. de Carvalho <sup>2</sup>, Breanna Kolwitz <sup>1</sup>, Chelsey Naito <sup>2</sup>, Kristine Coleman <sup>1,\*</sup> and Carol B. Hanna <sup>2</sup>

<sup>1</sup> Division of Comparative Medicine, Oregon National Primate Research Center, Oregon Health & Science University, Beaverton, OR 97006, USA; houserl@ohsu.edu (L.A.H.); kolwitz@ohsu.edu (B.K.)

<sup>2</sup> Division of Reproductive and Developmental Sciences, Oregon National Primate Research Center, Oregon Health & Science University, Beaverton, OR 97006, USA; ramseyc@ohsu.edu (C.R.); decarval@ohsu.edu (F.M.d.C.); naito@gmail.com (C.N.); hannaca@ohsu.edu (C.B.H.)

\* Correspondence: colemank@ohsu.edu

**Citation:** Houser, L.A.; Ramsey C.; Carvalho F.M.d.; Kolwitz B.; Naito C.; Coleman K.; Hanna C.B.

Improved Training and Semen Collection Outcomes Using the Closed Box Chair for Macaques. *Animals*

**2021**, *11*, 2384. <https://doi.org/10.3390/ani11082384>

Academic Editor(s): Mark J. Prescott; Melanie L. Graham

Received: 14 July 2021

Accepted: 9 August 2021

Published: 12 August 2021

**Publisher's Note:** MDPI stays neutral with regard to jurisdictional claims in published maps and institutional affiliations.

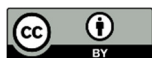

**Copyright:** by the authors. Licensee MDPI, Basel, Switzerland. This article is an open access article distributed under the terms and conditions of the Creative Commons Attribution (CC BY) license (<http://creativecommons.org/licenses/by/4.0/>).

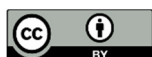

**Copyright:** © 2021 by the authors. Licensee MDPI, Basel, Switzerland. This article is an open access article distributed under the terms and conditions of the Creative Commons Attribution (CC BY) license (<http://creativecommons.org/licenses/by/4.0/>).

**Table S1.** Demographic information, training outcome (whether or not successfully trained), and whether or not their semen data were included, for study subjects. Social housing status refers to the predominant manner in which the monkey was housed (single housed or paired) during the training sessions; animals that changed status were identified as paired/single.

| Subject | Chair type | Age at start of training | Social housing status during training | Rearing history | Trained successfully | Included in semen analysis |
|---------|------------|--------------------------|---------------------------------------|-----------------|----------------------|----------------------------|
| C1      | CBC        | 12                       | Single                                | Mother          | Y                    | N                          |
| C2      | CBC        | 12                       | Single                                | Mother          | Y                    | Y                          |
| C3      | CBC        | 14                       | Paired/single                         | Mother          | Y                    | Y                          |
| C4      | CBC        | 10                       | Paired                                | Mother          | Y                    | Y                          |
| C5      | CBC        | 9                        | Single                                | Mother          | Y                    | N                          |
| C6      | CBC        | 7                        | Single                                | Mother          | Y                    | N                          |
| C7      | CBC        | 7                        | Paired/single                         | Mother          | Y                    | Y                          |
| C8      | CBC        | 8                        | Paired                                | Mother          | Y                    | Y                          |
| C9      | CBC        | 8                        | Paired                                | Mother          | Y                    | Y                          |
| C10     | CBC        | 8                        | Paired                                | Mother          | Y                    | Y                          |
| C11     | CBC        | 7                        | Paired                                | Mother          | Y                    | Y                          |
| C12     | CBC        | 6                        | Paired                                | Mother          | Y                    | Y                          |
| C13     | CBC        | 5                        | Paired/single                         | Mother          | Y                    | Y                          |
| C14     | CBC        | 5                        | Paired                                | Mother          | Y                    | N                          |
| O1      | ORC        | 11                       | Single                                | Mother          | N                    | N                          |
| O2      | ORC        | 11                       | Single                                | Mother          | N                    | N                          |
| O3      | ORC        | 10                       | Single                                | Mother          | N                    | N                          |
| O4      | ORC        | 8                        | Paired                                | Mother          | Y                    | N                          |
| O5      | ORC        | 10                       | Paired/single                         | Mother          | Y                    | N                          |
| O6      | ORC        | 8                        | Single                                | Mother          | N                    | N                          |
| O7      | ORC        | 8                        | Single                                | Mother          | Y                    | N                          |
| O8      | ORC        | 10                       | Single                                | Mother          | Y                    | N                          |
| O9      | ORC        | 7                        | Single                                | Mother          | Y                    | Y                          |
| O10     | ORC        | 8                        | Single                                | Mother          | Y                    | Y                          |
| O11     | ORC        | 6                        | Paired                                | Mother          | Y                    | Y                          |
| O12     | ORC        | 5                        | Paired/single                         | Nursery         | Y                    | Y                          |
| O13     | ORC        | 5                        | Paired/single                         | Nursery         | Y                    | Y                          |
| O14     | ORC        | 5                        | Single                                | Nursery         | Y                    | N                          |
| O15     | ORC        | 7                        | Single                                | Mother          | Y                    | N                          |
| O16     | ORC        | 7                        | Single                                | Mother          | Y                    | N                          |
| O17     | ORC        | 5                        | Paired/single                         | Mother          | Y                    | Y                          |
| O18     | ORC        | 7                        | Single                                | Mother          | Y                    | N                          |
| O19     | ORC        | 5                        | Paired                                | Nursery         | N                    | N                          |
| O20     | ORC        | 5                        | Paired/single                         | Mother          | Y                    | Y                          |

**Table S2.** Abbreviated shaping plan used to train animals to enter the open restraint chair and allow semen collection.

| <b>Description of training steps for open restraint chair (ORC)</b>                                                                                                                                                                                                |
|--------------------------------------------------------------------------------------------------------------------------------------------------------------------------------------------------------------------------------------------------------------------|
| Use counterconditioning techniques to desensitize subject to the movement/use of the squeeze back restraint mechanism in the home cage. This step is undertaken to reduce stress associated with this procedure in case it is needed during the course of training |
| Habituate animals to presence of equipment (e.g., chair, poles) while conducting the next 5 steps of training                                                                                                                                                      |
| Use shaping techniques to train subject to sit on the floor of the home cage in front of the cage door                                                                                                                                                             |
| Reinforce subject for remaining seated while pole is inserted into the cage and slowly moved toward the subject                                                                                                                                                    |
| Desensitize subject to the touch of the pole on a neutral body part (such as the leg or back) and gradually work up towards attaching the pole to the collar                                                                                                       |
| Once the subject allows the first pole to be attached, reinforce him for sitting calmly while the cage door is opened slightly, allowing the second pole to be attached to the opposite side of the collar                                                         |
| Fully open the cage door and encourage the subject to exit his cage and walk on floor by placing reinforcement small distances away from the cage opening                                                                                                          |
| Once subject is comfortable walking with the poles attached to the collar, gently guide him to the ORC and allow him to climb onto the platform                                                                                                                    |
| Gently guide the collar into the neck yoke, secure it in place and then remove the poles                                                                                                                                                                           |
| Desensitize the subject to manipulation and restraint of the arms and legs                                                                                                                                                                                         |
| Desensitize the subject to genital manipulation and to the equipment to be used for semen collection                                                                                                                                                               |

**Table S3.** Abbreviated shaping plan used to train animals to enter the closed box chair and allow semen collection.

| <b>Description of training steps for closed box chair (CBC)</b>                                                                                                                                                                                                    |
|--------------------------------------------------------------------------------------------------------------------------------------------------------------------------------------------------------------------------------------------------------------------|
| Use counterconditioning techniques to desensitize subject to the movement/use of the squeeze back restraint mechanism in the home cage. This step is undertaken to reduce stress associated with this procedure in case it is needed during the course of training |
| Place CBC in front of subject's home cage and use shaping techniques to train subject to enter chair and allow doors to be closed                                                                                                                                  |
| Use shaping techniques to train subject to sit on the floor of the chair                                                                                                                                                                                           |
| Reinforce subject for remaining seated while plates are inserted and secured around the waist                                                                                                                                                                      |
| Desensitize subject to manipulation and restraint of the legs                                                                                                                                                                                                      |
| Desensitize the subject to genital manipulation and to the equipment to be used for semen collection                                                                                                                                                               |
